# Supplementary material for: Clinical and Parasitological Features of Patients with American Cutaneous Leishmaniasis that Did Not Respond to Treatment with Meglumine Antimoniate
Source: PubMed Central journal article supplement (PMC4887049; doi:10.1371/journal.pntd.0004739), 2016-05-31
Supplement: pntd.0004739.s001.pdf [file pntd.0004739.s001.pdf]

S1 Table. Summary of Clinical Features of Patients without Parasite Isolation

1

| Patient ID | Leishmania species    | Topology           | # of lesions | Lesion size(cm <sup>2</sup> ) <sup>i</sup> | Evolution (weeks) | Time of the Last Treatment <sup>ii</sup> | Geographic procedence <sup>iii</sup> | # of AM-Treatments <sup>iv</sup> | # of Non - AM-treatment <sup>v</sup> | Treatment outcome | Previous Episodes | Previous AM treatment <sup>vi</sup> |
|------------|-----------------------|--------------------|--------------|--------------------------------------------|-------------------|------------------------------------------|--------------------------------------|----------------------------------|--------------------------------------|-------------------|-------------------|-------------------------------------|
| 1          | <i>L.braziliensis</i> | UP <sup>1</sup>    | 1            | 13,3                                       | 16                | 6                                        | 1                                    | 1                                | 0                                    | Failure           | 0                 | 0                                   |
| 3          | <i>L.braziliensis</i> | UP                 | 1            | 7,5                                        | 57                | 11                                       | 1                                    | 1                                | 0                                    | Failure           | 1                 | 1                                   |
| 4          | <i>L.braziliensis</i> | UP                 | 1            | 1,68                                       | 20                | 9                                        | 4                                    | 1                                | 0                                    | Failure           | 0                 | 0                                   |
| 5          | <i>L.braziliensis</i> | face&neck          | 3            | 8,99                                       | 40                | 21                                       | 4                                    | 1                                | 0                                    | Failure           | 0                 | 0                                   |
| 6          | <i>L.braziliensis</i> | face&neck          | 1            | 13,2                                       | 11                | 5                                        | 4                                    | 1                                | 0                                    | Failure           | 0                 | 0                                   |
| 12         | <i>L.braziliensis</i> | ML <sup>2</sup>    | 3            | 5                                          | 28                | 5                                        | 4                                    | 1                                | 0                                    | Failure           | 0                 | 0                                   |
| 13         | <i>L.braziliensis</i> | Legs               | 6            | 6                                          | 14                | 4                                        | 4                                    | 1                                | 0                                    | Failure           | 0                 | 0                                   |
| 14         | <i>L.braziliensis</i> | Thoracic-abdominal | 3            | 1,8                                        | 28                | 25                                       | 4                                    | 1                                | 0                                    | Failure           | 0                 | 0                                   |
| 15         | <i>L.braziliensis</i> | UP                 | 1            | 15                                         | 16                | 25                                       | 4                                    | 1                                | 0                                    | Failure           | 0                 | 0                                   |
| 16         | <i>L.braziliensis</i> | ML                 | 5            | 2,25                                       | 32                | 25                                       | 4                                    | 1                                | 0                                    | Failure           | 0                 | 0                                   |
| 17         | <i>L.braziliensis</i> | ML                 | 1            | 2,55                                       | 16                | 5                                        | NI <sup>3</sup>                      | 1                                | 0                                    | Failure           | 1                 | 1                                   |
| 19         | NI <sup>3</sup>       | Legs               | 2            | 26,5                                       | 36                | 29                                       | 4                                    | 2                                | 0                                    | Failure           | 0                 | 0                                   |
| 20         | <i>L.braziliensis</i> | Legs               | 3            | 2,56                                       | 20                | 5                                        | 4                                    | 1                                | 0                                    | Failure           | 0                 | 0                                   |
| 21         | <i>L.braziliensis</i> | ML                 | 3            | 10                                         | 16                | 5                                        | 4                                    | 1                                | 0                                    | Failure           | 0                 | 0                                   |
| 28         | <i>L.braziliensis</i> | UP                 | 1            | 95                                         | 192               | 112                                      | 1                                    | 3                                | 1                                    | Relapse           | 0                 | 0                                   |
| 29         | <i>L.braziliensis</i> | ML                 | 3            | 2,5                                        | 41                | 33                                       | 4                                    | 2                                | 0                                    | Failure           | 0                 | 0                                   |
| 34         | <i>L.braziliensis</i> | Legs               | 1            | 8,75                                       | 32                | 9                                        | 4                                    | 1                                | 0                                    | Failure           | 0                 | 0                                   |
| 35         | <i>L.braziliensis</i> | ML                 | 4            | 2,25                                       | 16                | 9                                        | 4                                    | 1                                | 0                                    | Failure           | 0                 | 0                                   |
| 47         | <i>L.braziliensis</i> | ML                 | 10           | 6                                          | 128               | 113                                      | 1                                    | 3                                | 1                                    | Failure           | 0                 | 0                                   |
| 59         | <i>L.braziliensis</i> | face&neck          | 1            | 22,5                                       | 96                | 29                                       | 4                                    | 1                                | 0                                    | Failure           | 0                 | 0                                   |
| 62         | <i>L.braziliensis</i> | UP                 | 2            | 24                                         | 36                | NI                                       | 4                                    | 2                                | 4                                    | Relapse           | 0                 | 0                                   |

<sup>1</sup>UP, Upper Limbs<sup>2</sup>ML, Multiple lesions located in different topology<sup>3</sup>NI, No information

- 
- <sup>i</sup> The biggest lesion in cases with multiple lesions
  - <sup>ii</sup> Weeks elapsed between the end of treatment and the date of patient recruitment
  - <sup>iii</sup> Internal code assigned for the study.
  - <sup>iv</sup> Number of treatments received for this lesion with AM
  - <sup>v</sup> Treatments received for this lesion with drugs different from AM
  - <sup>vi</sup> Number of treatments received for previous ALC. episodes
