# Supplementary material for: Clinical and Parasitological Features of Patients with American Cutaneous Leishmaniasis that Did Not Respond to Treatment with Meglumine Antimoniate
Source: PubMed Central journal article supplement (PMC4887049; doi:10.1371/journal.pntd.0004739), 2016-05-31
Supplement: pntd.0004739.s002.pdf [file pntd.0004739.s002.pdf]

S2 Table. Main clinical features of patients with parasitic isolation 2

| Patiente (Isolate) ID | Leishmania species     | Topology          | # of lesions | Lesion size(cm <sup>2</sup> ) <sup>i</sup> | Evolution (weeks) | Time of the Last Treatment <sup>ii</sup> | Geographic procedence <sup>iii</sup> | # of AM-Treatments <sup>iv</sup> | # of Non -AM-treatment <sup>v</sup> | Treatment outcome | Previous Episodes | Previous AM treatment <sup>vi</sup> |
|-----------------------|------------------------|-------------------|--------------|--------------------------------------------|-------------------|------------------------------------------|--------------------------------------|----------------------------------|-------------------------------------|-------------------|-------------------|-------------------------------------|
| 2                     | <i>L. braziliensis</i> | face&neck         | 1            | 9,6                                        | 36                | 26                                       | 4                                    | 1                                | 1                                   | Failure           | 0                 | 0                                   |
| 8                     | <i>L. braziliensis</i> | ML <sup>vii</sup> | 13           | 6                                          | 12                | NI <sup>viii</sup>                       | 4                                    | 1                                | 0                                   | Failure           | 0                 | 0                                   |
| 9                     | <i>L. braziliensis</i> | ML                | 2            | 2,25                                       | 12                | 0                                        | 4                                    | 1                                | 0                                   | Failure           | 0                 | 0                                   |
| 10                    | <i>L. braziliensis</i> | UP <sup>ix</sup>  | 1            | 9                                          | 12                | 5                                        | 4                                    | 1                                | 0                                   | Failure           | 0                 | 0                                   |
| 11                    | <i>L. braziliensis</i> | Legs              | 1            | 3                                          | 10                | 7                                        | 4                                    | 1                                | 1                                   | Failure           | 1                 | 3                                   |
| 18                    | <i>L. braziliensis</i> | UP                | 1            | 4,4                                        | 36                | 30                                       | 4                                    | 1                                | 0                                   | Failure           | 0                 | 0                                   |
| 23                    | <i>L. braziliensis</i> | UP                | 1            | 10,8                                       | 16                | 8                                        | 1                                    | 1                                | 0                                   | Relapse           | 0                 | 0                                   |
| 26                    | <i>L. braziliensis</i> | UP                | 1            | 9,35                                       | 44                | 41                                       | 4                                    | 1                                | 1                                   | Failure           | 0                 | 0                                   |
| 44                    | <i>L. braziliensis</i> | UP                | 1            | 22                                         | 56                | 53                                       | 4                                    | 1                                | 2                                   | Failure           | 0                 | 0                                   |
| 36                    | <i>L. braziliensis</i> | UP                | 1            | 12                                         | 44                | 41                                       | 4                                    | 1                                | 1                                   | Failure           | 0                 | 0                                   |
| 40                    | <i>L. braziliensis</i> | ML                | 9            | 190                                        | 20                | 4                                        | 1                                    | 1                                | 0                                   | Failure           | 0                 | 0                                   |
| 41                    | <i>L. braziliensis</i> | UP                | 1            | 7,8                                        | 20                | 8                                        | 1                                    | 1                                | 0                                   | Failure           | 0                 | 0                                   |
| 42                    | <i>L. braziliensis</i> | UP                | 1            | 4,62                                       | 40                | 37                                       | 1                                    | 1                                | 0                                   | Relapse           | 1                 | 1                                   |
| 43                    | <i>L. guyanensis</i>   | face&neck         | 1            | 4,4                                        | 40                | 37                                       | 5                                    | 2                                | 0                                   | Relapse           | 0                 | 0                                   |
| 45                    | <i>L. braziliensis</i> | ML                | 4            | 7,5                                        | 64                | 49                                       | 4                                    | 1                                | 0                                   | Failure           | 0                 | 0                                   |
| 46                    | <i>L. braziliensis</i> | UP                | 1            | 6,1                                        | 124               | 113                                      | 4                                    | 1                                | 2                                   | Relapse           | 0                 | 0                                   |
| 48                    | <i>L. braziliensis</i> | ML                | 16           | 10,5                                       | 23                | 16                                       | 4                                    | 1                                | 0                                   | Failure           | 0                 | 0                                   |
| 60                    | <i>L. braziliensis</i> | ML                | 5            | 6                                          | 52                | 45                                       | 4                                    | 1                                | 2                                   | Failure           | 0                 | 0                                   |
| 53                    | <i>L. braziliensis</i> | UP                | 0            | 6,16                                       | 26                | 15                                       | 1                                    | 1                                | 1                                   | Failure           | 0                 | 0                                   |
| 57                    | <i>L. braziliensis</i> | face&neck         | 1            | 8,75                                       | 48                | 45                                       | 1                                    | 2                                | 0                                   | Failure           | 0                 | 0                                   |
| 61                    | <i>L. braziliensis</i> | UP                | 3            | 12,6                                       | 60                | NI                                       | 5                                    | 1                                | 0                                   | Relapse           | 0                 | 0                                   |
| 63                    | <i>L. braziliensis</i> | face&neck         | 2            | 4                                          | 76                | NI                                       | 4                                    | 2                                | 0                                   | Relapse           | 0                 | 0                                   |

- 
- <sup>i</sup> The biggest lesion in cases with multiple lesions
  - <sup>ii</sup> Weeks elapsed between the end of treatment and the parasitic isolation.
  - <sup>iii</sup> Internal code assigned for the study.
  - <sup>iv</sup> Number of treatments received for this lesion with AM
  - <sup>v</sup> Treatments received for this lesion with drugs different from AM
  - <sup>vi</sup> Number of treatments received for previous LC. episodes
  - <sup>vii</sup> ML, multiple lesion located with different topology
  - <sup>viii</sup> NI, no information
  - <sup>ix</sup> UP, upper Limbs
