# Supplementary material for: Clinical and Parasitological Features of Patients with American Cutaneous Leishmaniasis that Did Not Respond to Treatment with Meglumine Antimoniate
Source: PubMed Central journal article supplement (PMC4887049; doi:10.1371/journal.pntd.0004739), 2016-05-31
Supplement: pntd.0004739.s005.pdf [file pntd.0004739.s005.pdf]

### Control Group 1

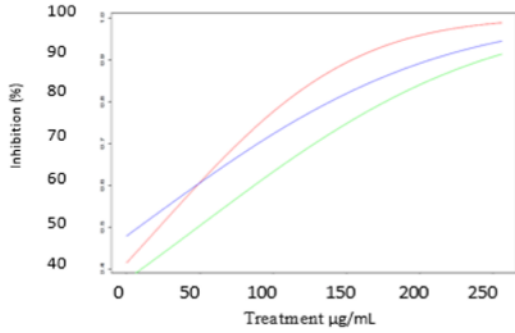

Coefficients:

|             | Estimate   | Std. Error | z value | Pr(> z )     |
|-------------|------------|------------|---------|--------------|
| (Intercept) | 0.1142904  | 0.0286129  | 3.994   | 6.49e-05 *** |
| Treatment   | 0.0073122  | 0.0001544  | 47.344  | < 2e-16 ***  |
| Replication | -0.1507419 | 0.0124034  | -12.153 | < 2e-16 ***  |

|             | DL 50  | LI     | LS     |
|-------------|--------|--------|--------|
| Replication | 5.171  | -5.818 | 16.666 |
| Replication | 25.858 | 10.804 | 41.593 |
| Replication | 46.545 | 27.428 | 66.519 |

### Isolate Patient 8

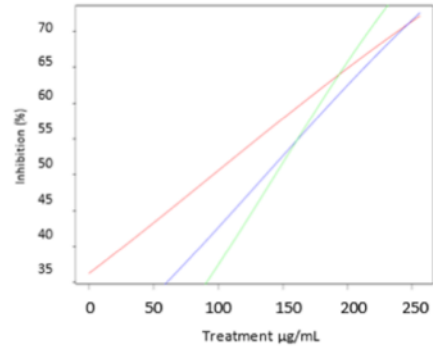

Coefficients:

|             | Estimate   | Std. Error | z value | Pr(> z )     |
|-------------|------------|------------|---------|--------------|
| (Intercept) | -0.2800590 | 0.0434581  | -6.444  | 1.16e-10 *** |
| Treatment   | 0.0049738  | 0.0001916  | 25.962  | < 2e-16 ***  |
| Replication | -0.1908983 | 0.0207795  | -9.187  | < 2e-16 ***  |

|             | DL 50   | LI      | LS      |
|-------------|---------|---------|---------|
| Replication | 95.677  | 64.495  | 129.801 |
| Replication | 131.878 | 92.565  | 180.172 |
| Replication | 170.667 | 120.634 | 230.543 |

### Isolate Patient 9

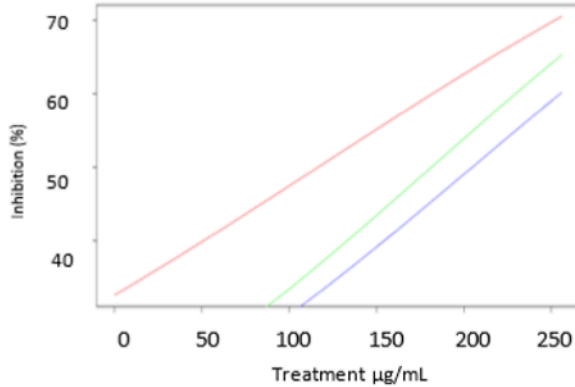

Coefficients:

|             | Estimate   | Std. Error | z value | Pr(> z )   |
|-------------|------------|------------|---------|------------|
| (Intercept) | -0.3550922 | 0.0408054  | -8.702  | <2e-16 *** |
| Treatment   | 0.0045397  | 0.0001803  | 25.172  | <2e-16 *** |
| Replication | -0.2167800 | 0.0195758  | -11.074 | <2e-16 *** |

|             | DL 50   | LI      | LS      |
|-------------|---------|---------|---------|
| Replication | 126.707 | 92.748  | 164.821 |
| Replication | 173.252 | 129.262 | 225.715 |
| Replication | 222.384 | 165.775 | 286.608 |

### Isolate Patient 46

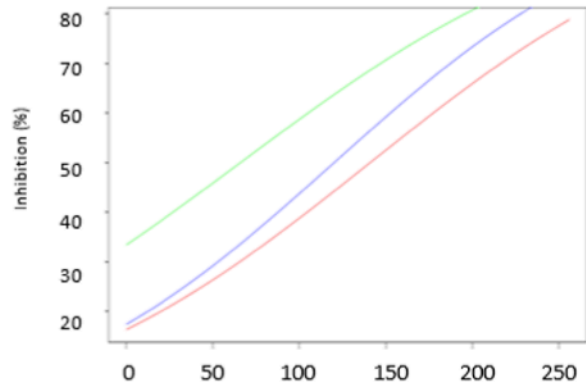

Coefficients:

|             | Estimate   | Std. Error | z value | Pr(> z )   |
|-------------|------------|------------|---------|------------|
| (Intercept) | -1.2926925 | 0.0368649  | -35.07  | <2e-16 *** |
| Treatment   | 0.0069107  | 0.0001505  | 45.92   | <2e-16 *** |
| Replication | 0.2699006  | 0.0140553  | 19.20   | <2e-16 *** |

|             | DL 50   | LI      | LS      |
|-------------|---------|---------|---------|
| Replication | 147.394 | 169.454 | 128.269 |
| Replication | 108.606 | 86.959  | 132.849 |
| Replication | 69.818  | 45.650  | 96.245  |

### Isolate Patient 53

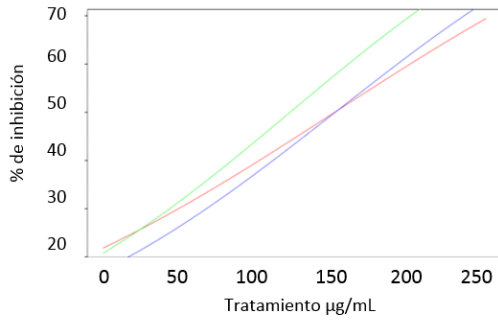

Coefficients:

|             | Estimate   | Std. Error | z value | Pr(> z )    |
|-------------|------------|------------|---------|-------------|
| (Intercept) | -0.9435694 | 0.0412931  | -22.851 | < 2e-16 *** |
| tratamiento | 0.0058480  | 0.0001648  | 35.488  | < 2e-16 *** |
| bloques     | 0.0463504  | 0.0179795  | 2.578   | 0.00994 **  |

|          | DL 50   | LI      | LS      |
|----------|---------|---------|---------|
| Bloque 1 | 152.565 | 126.583 | 183.415 |
| Bloque 2 | 144.808 | 113.379 | 181.384 |
| Bloque 3 | 137.050 | 100.175 | 179.352 |

### Isolate Patient 10

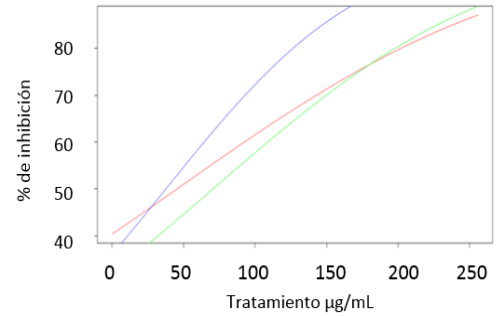

Coefficients:

|             | Estimate   | Std. Error | z value | Pr(> z )     |
|-------------|------------|------------|---------|--------------|
| (Intercept) | -0.2244816 | 0.0343326  | -6.538  | 6.22e-11 *** |
| tratamiento | 0.0066629  | 0.0001775  | 37.540  | < 2e-16 ***  |
| bloques     | -0.0574359 | 0.0154318  | -3.722  | 0.000198 *** |

|          | DL 50  | LI     | LS     |
|----------|--------|--------|--------|
| Bloque 1 | 41.373 | 26.351 | 59.948 |
| Bloque 2 | 51.717 | 30.246 | 73.789 |
| Bloque 3 | 59.474 | 87.630 | 34.141 |

### Isolate Patient 18

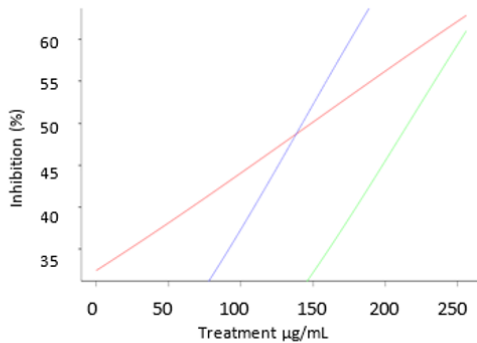

Coefficients:

|             | Estimate   | Std. Error | z value | Pr(> z )     |
|-------------|------------|------------|---------|--------------|
| (Intercept) | -0.3154095 | 0.0797853  | -3.953  | 7.71e-05 *** |
| Treatment   | 0.0055721  | 0.0003429  | 16.248  | < 2e-16 ***  |
| Replication | -0.3267237 | 0.0381657  | -8.561  | < 2e-16 ***  |

|             | DL 50   | LI      | LS      |
|-------------|---------|---------|---------|
| Replication | 116.363 | 65.944  | 178.077 |
| Replication | 173.252 | 106.347 | 259.965 |
| Replication | 232.727 | 146.749 | 341.853 |

### Isolate Patient 11

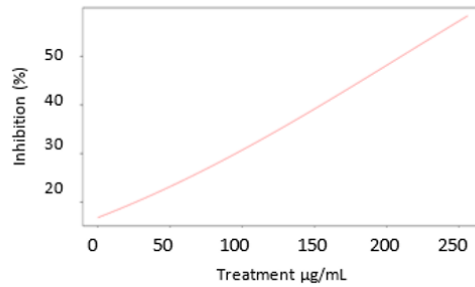

Coefficients:

|             | Estimate   | Std. Error | z value | Pr(> z )    |
|-------------|------------|------------|---------|-------------|
| (Intercept) | -1.0200130 | 0.0871962  | -11.70  | < 2e-16 *** |
| Treatment   | 0.0045620  | 0.0003544  | 12.87   | < 2e-16 *** |
| Replication | 0.0312841  | 0.0381684  | 0.82    | 0.412       |

|             | DL 50   | LI      | LS      |
|-------------|---------|---------|---------|
| Replication | 209.454 | 165.111 | 272.061 |

### Isolate Patient 2

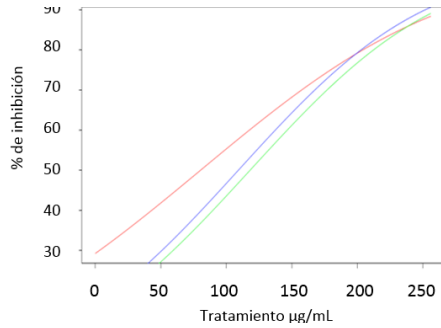

Coefficients:

|             | Estimate   | Std. Error | z value | Pr(> z )    |
|-------------|------------|------------|---------|-------------|
| (Intercept) | -0.5282988 | 0.0503333  | -10.496 | < 2e-16 *** |
| tratamiento | 0.0083127  | 0.0002304  | 36.082  | < 2e-16 *** |
| bloques     | -0.1688717 | 0.0220336  | -7.664  | 1.8e-14 *** |

|          | DL 50   | LI     | LS      |
|----------|---------|--------|---------|
| Bloque 1 | 82.747  | 63.454 | 106.559 |
| Bloque 2 | 103.434 | 77.831 | 133.472 |
| Bloque 3 | 124.121 | 92.208 | 160.385 |

### Isolate Patient 57

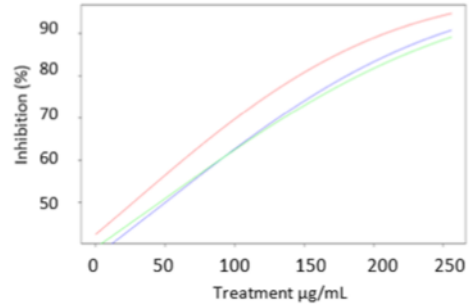

Coefficients:

|             | Estimate   | Std. Error | z value | Pr(> z )    |
|-------------|------------|------------|---------|-------------|
| (Intercept) | -0.0860555 | 0.0575734  | -1.495  | 0.13499     |
| Treatment   | 0.0065633  | 0.0003229  | 20.324  | < 2e-16 *** |
| Replication | -0.0885944 | 0.0272656  | -3.249  | 0.00116 **  |

|             | DL 50  | LI     | LS      |
|-------------|--------|--------|---------|
| Replication | 25.858 | 1.119  | 57.268  |
| Replication | 41.373 | 6.006  | 81.108  |
| Replication | 54.303 | 10.892 | 104.948 |

### Isolate Patient 40

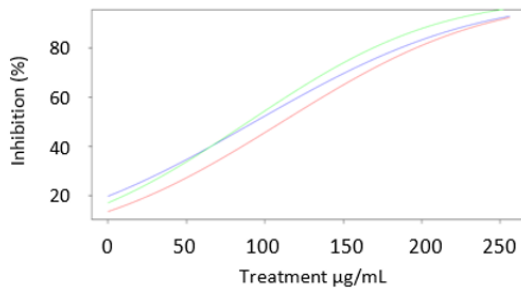

Coefficients:

|             | Estimate   | Std. Error | z value | Pr(> z )     |
|-------------|------------|------------|---------|--------------|
| (Intercept) | -1.1478090 | 0.0563882  | -20.355 | < 2e-16 ***  |
| Treatment   | 0.0096620  | 0.0002657  | 36.369  | < 2e-16 ***  |
| Replication | 0.1053848  | 0.0254454  | 4.142   | 3.45e-05 *** |

|             | DL 50   | LI     | LS      |
|-------------|---------|--------|---------|
| Replication | 108.606 | 86.657 | 131.418 |
| Replication | 98.262  | 71.342 | 125.399 |
| Replication | 85.333  | 56.027 | 119.381 |

### Isolate Patient 36

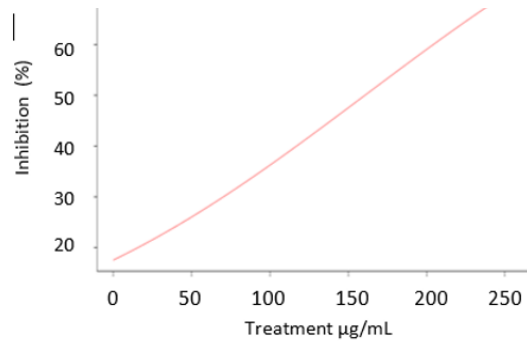

Coefficients:

|             | Estimate   | Std. Error | z value | Pr(> z )    |
|-------------|------------|------------|---------|-------------|
| (Intercept) | -0.9452154 | 0.0396696  | -23.83  | < 2e-16 *** |
| Treatment   | 0.0058000  | 0.0001572  | 36.91   | < 2e-16 *** |
| Replication | 0.0072691  | 0.0169221  | 0.43    | 0.668       |

|             | DL 50   | LI      | LS      |
|-------------|---------|---------|---------|
| Replication | 160.323 | 145.951 | 176.511 |

### Isolate Patient 23

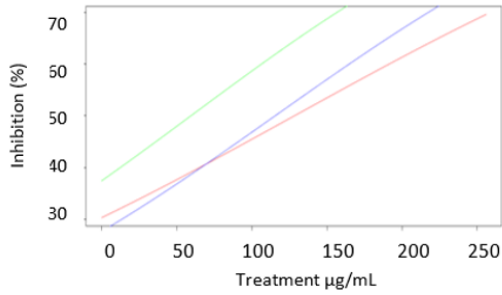

Coefficients:

|             | Estimate   | Std. Error | z value | Pr(> z )   |
|-------------|------------|------------|---------|------------|
| (Intercept) | -0.8048699 | 0.0438094  | -18.372 | <2e-16 *** |
| Treatment   | 0.0048875  | 0.0001788  | 27.338  | <2e-16 *** |
| Replication | 0.1621786  | 0.0179765  | 9.022   | <2e-16 *** |

|             | DL 50   | LI     | LS      |
|-------------|---------|--------|---------|
| Replication | 131.878 | 99.693 | 168.145 |
| Replication | 98.262  | 61.986 | 140.181 |
| Replication | 64.646  | 24.279 | 112.216 |

### Isolate Patient 60

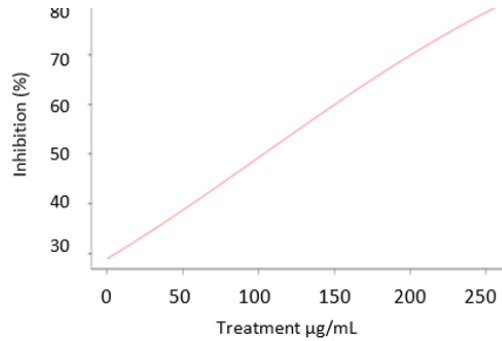

Coefficients:

|             | Estimate   | Std. Error | z value | Pr(> z )   |
|-------------|------------|------------|---------|------------|
| (Intercept) | -0.5482059 | 0.0549694  | -9.973  | <2e-16 *** |
| Treatment   | 0.0053810  | 0.0002354  | 22.862  | <2e-16 *** |
| Replication | -0.0035630 | 0.0237259  | -0.150  | 0.881      |

|             | DL 50   | LI     | LS      |
|-------------|---------|--------|---------|
| Replication | 103.434 | 85.975 | 123.624 |

### Isolate Patient 41

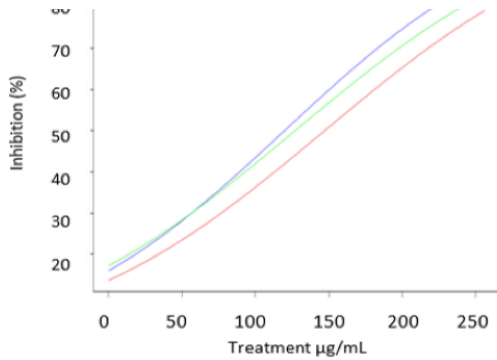

Coefficients:

|             | Estimate   | Std. Error | z value | Pr(> z )     |
|-------------|------------|------------|---------|--------------|
| (Intercept) | -1.1632422 | 0.0466028  | -24.961 | < 2e-16 ***  |
| Treatment   | 0.0076343  | 0.0002067  | 36.942  | < 2e-16 ***  |
| Replication | 0.0755058  | 0.0195855  | 3.855   | 0.000116 *** |

|             | DL 50   | LI      | LS      |
|-------------|---------|---------|---------|
| Replication | 142.222 | 119.217 | 168.335 |
| Replication | 131.878 | 105.047 | 163.199 |
| Replication | 121.535 | 90.876  | 158.062 |

### Isolate Patient 42

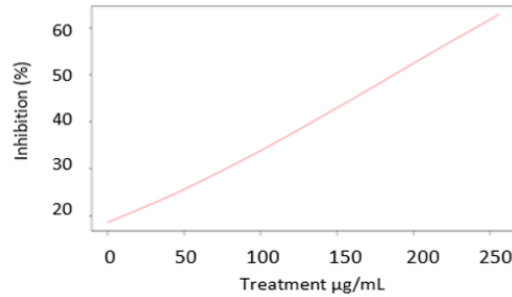

Coefficients:

|             | Estimate   | Std. Error | z value | Pr(> z )  |
|-------------|------------|------------|---------|-----------|
| (Intercept) | -0.9316093 | 0.0417345  | -22.322 | <2e-16 ** |
| Treatment   | 0.0047669  | 0.0001477  | 32.266  | <2e-16 ** |
| Replication | 0.0178563  | 0.0170924  | 1.045   | 0.296     |

|             | DL 50   | LI      | LS      |
|-------------|---------|---------|---------|
| Replication | 186.182 | 169.161 | 207.799 |

## Control Group2

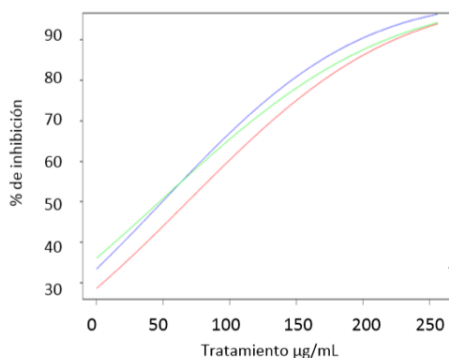

Coefficients:

|             | Estimate  | Std. Error | z value | Pr(> z )     |
|-------------|-----------|------------|---------|--------------|
| (Intercept) | -0.597133 | 0.031038   | -19.239 | < 2e-16 ***  |
| tratamiento | 0.008109  | 0.000158   | 51.307  | < 2e-16 ***  |
| bloques     | 0.075481  | 0.012979   | 5.815   | 6.05e-09 *** |

|          | DL 50  | LI     | LS     |
|----------|--------|--------|--------|
| Bloque 1 | 64.646 | 51.784 | 77.815 |
| Bloque 2 | 54.303 | 39.770 | 71.418 |
| Bloque 3 | 46.545 | 27.757 | 65.021 |

## Isolate Patient 44

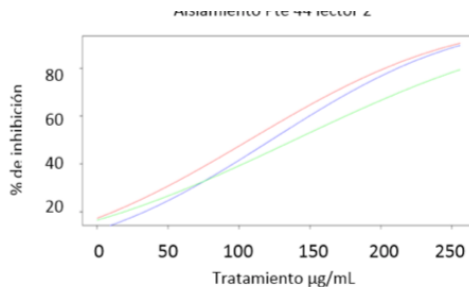

Coefficients:

|             | Estimate   | Std. Error | z value | Pr(> z )     |
|-------------|------------|------------|---------|--------------|
| (Intercept) | -0.8320812 | 0.0321049  | -25.918 | < 2e-16 ***  |
| tratamiento | 0.0083683  | 0.0001473  | 56.806  | < 2e-16 ***  |
| bloques     | -0.0949337 | 0.0142564  | -6.659  | 2.76e-11 *** |

|          | DL 50   | LI      | LS      |
|----------|---------|---------|---------|
| Bloque 1 | 111.191 | 96.647  | 125.898 |
| Bloque 2 | 121.535 | 104.406 | 141.078 |
| Bloque 3 | 134.464 | 112.165 | 156.259 |

## Isolate Patient 48

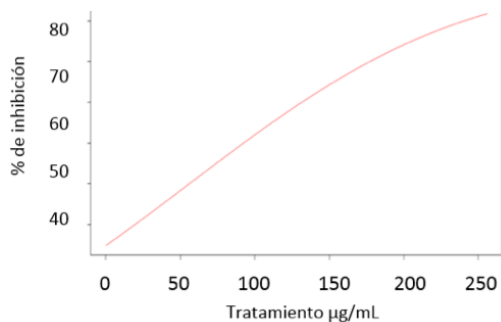

Coefficients:

|             | Estimate   | Std. Error | z value | Pr(> z )    |
|-------------|------------|------------|---------|-------------|
| (Intercept) | -0.4175882 | 0.0371393  | -11.24  | < 2e-16 *** |
| tratamiento | 0.0069462  | 0.0001841  | 37.73   | < 2e-16 *** |
| bloques     | 0.0139521  | 0.0156811  | 0.89    | 0.374       |

|          | DL 50  | LI     | LS     |
|----------|--------|--------|--------|
| Bloque 1 | 56.888 | 64.379 | 48.361 |

## Isolate Patient 50

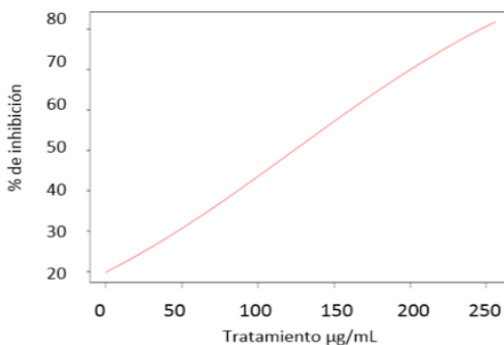

Coefficients:

|             | Estimate   | Std. Error | z value | Pr(> z )    |
|-------------|------------|------------|---------|-------------|
| (Intercept) | -0.7916456 | 0.0392656  | -20.161 | < 2e-16 *** |
| tratamiento | 0.0068593  | 0.0001707  | 40.181  | < 2e-16 *** |
| bloques     | -0.0276865 | 0.0168688  | -1.641  | 0.101       |

|          | DL 50   | LI      | LS      |
|----------|---------|---------|---------|
| Bloque 1 | 124.121 | 112.348 | 135.858 |

### Isolate Patient 26

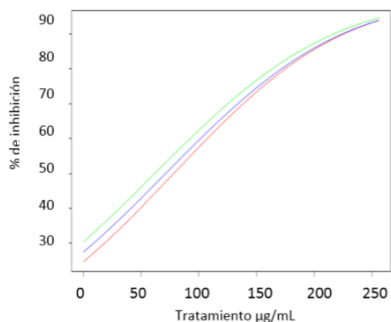

Coefficients:

|             | Estimate   | Std. Error | z value | Pr(> z )    |
|-------------|------------|------------|---------|-------------|
| (Intercept) | -0.7358515 | 0.0328646  | -22.390 | < 2e-16 *** |
| tratamiento | 0.0084262  | 0.0001552  | 54.303  | < 2e-16 *** |
| bloques     | 0.0706086  | 0.0137278  | 5.143   | 2.7e-07 *** |

|          | DL 50  | LI     | LS     |
|----------|--------|--------|--------|
| Bloque 1 | 80.161 | 65.803 | 93.028 |
| Bloque 2 | 69.818 | 54.610 | 87.665 |
| Bloque 3 | 62.060 | 43.417 | 82.302 |

### Isolate Patient 61

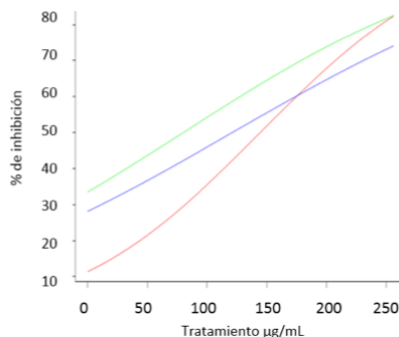

Coefficients:

|             | Estimate   | Std. Error | z value | Pr(> z )     |
|-------------|------------|------------|---------|--------------|
| (Intercept) | -1.2207434 | 0.0801513  | -15.230 | < 2e-16 ***  |
| tratamiento | 0.0060390  | 0.0003283  | 18.397  | < 2e-16 ***  |
| bloques     | 0.2502107  | 0.0327201  | 7.647   | 2.06e-14 *** |

|          | DL 50   | LI      | LS      |
|----------|---------|---------|---------|
| Bloque 1 | 160.323 | 112.082 | 220.810 |
| Bloque 2 | 118.949 | 64.933  | 186.436 |
| Bloque 3 | 77.575  | 17.783  | 152.062 |

### Isolate Patient 63

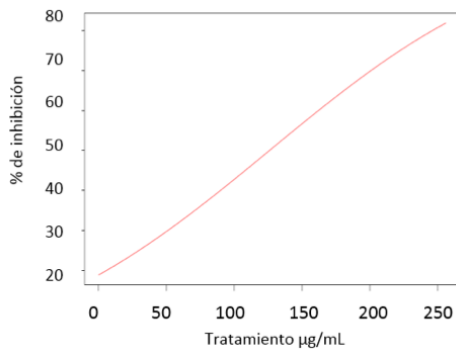

Coefficients:

|             | Estimate | Std. Error | z value | Pr(> z )   |
|-------------|----------|------------|---------|------------|
| (Intercept) | -2.08564 | 0.07403    | -28.173 | <2e-16 *** |
| tratamiento | 0.46592  | 0.01309    | 35.596  | <2e-16 *** |
| bloques     | 0.04674  | 0.02502    | 1.868   | 0.0618     |

|          | DL 50   | LI      | LS      |
|----------|---------|---------|---------|
| Bloque 1 | 126.707 | 110.989 | 143.105 |

### Control Group3

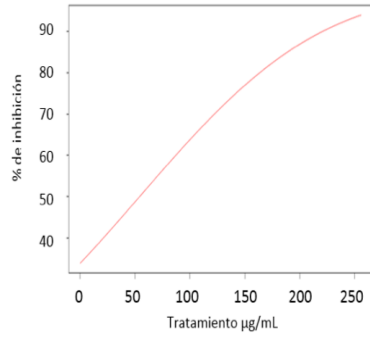

Coefficients: Estimate Std. Error z value Pr(>|z|)

|             |            |           |        |              |
|-------------|------------|-----------|--------|--------------|
| (Intercept) | -0.3443794 | 0.0716944 | -4.803 | 1.56e-06 *** |
| tratamiento | 0.0077024  | 0.0003838 | 20.067 | < 2e-16 ***  |
| bloques     | -0.0376051 | 0.0319305 | -1.178 | 0.239        |

|          | DL 50  | LI     | LS     |
|----------|--------|--------|--------|
| Bloque 1 | 54.303 | 41.104 | 69.941 |

### Isolate Patient 43

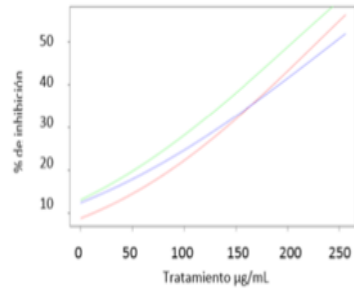

Coefficients: Estimate Std. Error z value Pr(>|z|)

|             |            |           |         |              |
|-------------|------------|-----------|---------|--------------|
| (Intercept) | -1.3858674 | 0.0418221 | -33.137 | < 2e-16 ***  |
| tratamiento | 0.0052959  | 0.0001529 | 34.639  | < 2e-16 ***  |
| bloques     | 0.0910909  | 0.0175906 | 5.178   | 2.24e-07 *** |

|          | DL 50   | LI      | LS      |
|----------|---------|---------|---------|
| Bloque 1 | 245.656 | 210.459 | 282.696 |
| Bloque 2 | 227.555 | 188.025 | 271.358 |
| Bloque 3 | 209.454 | 165.590 | 260.020 |
